# Supplementary material for: Estimating the global impact of poor quality of care on maternal and neonatal outcomes in 81 low- and middle-income countries: A modeling study
Source: PubMed Central journal article supplement (PMC6919595; doi:10.1371/journal.pmed.1002990), 2019-12-18
Supplement: pmed.1002990.s002.pdf [file pmed.1002990.s002.pdf]

S1 TABLE: Lives Saved Tool parameters and data sources (Version 5.67)

| Modeling Parameter                                                  | Data Source (default)                                                                                                                                                                                                                                                                                                              |
|---------------------------------------------------------------------|------------------------------------------------------------------------------------------------------------------------------------------------------------------------------------------------------------------------------------------------------------------------------------------------------------------------------------|
| <b>MORTALITY</b>                                                    |                                                                                                                                                                                                                                                                                                                                    |
| <b>Child/neonatal</b>                                               |                                                                                                                                                                                                                                                                                                                                    |
| Child and neonatal mortality                                        | United Nations Inter-agency Group for Child Mortality Estimation (UN IGME) [1]                                                                                                                                                                                                                                                     |
| Cause of death distribution                                         | Liu et al. (2016) [2]                                                                                                                                                                                                                                                                                                              |
| <b>Maternal</b>                                                     |                                                                                                                                                                                                                                                                                                                                    |
| Maternal mortality                                                  | WHO, UNICEF, UNFPA, World Bank Group and the United Nations Population Division. Trends in maternal mortality: 1990 to 2015. [3] <a href="http://www.who.int/reproductivehealth/publications/monitoring/maternal-mortality-2015/en/">http://www.who.int/reproductivehealth/publications/monitoring/maternal-mortality-2015/en/</a> |
| Cause of death distribution                                         | Say et al. (2014) [4]                                                                                                                                                                                                                                                                                                              |
| <b>Stillbirths</b>                                                  |                                                                                                                                                                                                                                                                                                                                    |
| Stillbirth rates                                                    | WHO estimates for years 2000-2015 <a href="http://datacompass.lshtm.ac.uk/115/">http://datacompass.lshtm.ac.uk/115/</a>                                                                                                                                                                                                            |
| Percent by proximate causes ( <i>i.e. antepartum, intrapartum</i> ) | Lawn et al. (2016) [5]                                                                                                                                                                                                                                                                                                             |
| <b>HEALTH STATUS AND COVERAGE</b>                                   |                                                                                                                                                                                                                                                                                                                                    |
| Nutritional deficiencies                                            | Demographic and Health Surveys (DHS) and Multiple Indicator Cluster Surveys (MICS)                                                                                                                                                                                                                                                 |
| Anthropometry indicators                                            | Demographic and Health Surveys (DHS) and Multiple Indicator Cluster Surveys (MICS)                                                                                                                                                                                                                                                 |
| Intervention coverage                                               | Demographic and Health Surveys (DHS) and Multiple Indicator Cluster Surveys (MICS)                                                                                                                                                                                                                                                 |

<sup>[1]</sup> UNICEF W, World Bank Group and United Nations, Levels & Trends in Child Mortality: Report 2017, Estimates developed by the United Nations Inter-agency Group for Child Mortality Estimation. New York, 2017.

<sup>[2]</sup> Liu L, Oza S, Hogan D, et al. Global, regional, and national causes of under-5 mortality in 2000–15: an updated systematic analysis with implications for the Sustainable Development Goals. *Lancet* (London, England) 2016;388(10063):3027-35. doi: 10.1016/S0140-6736(16)31593-8.

<sup>[3]</sup> WHO, UNICEF, UNFPA, World Bank Group and the United Nations Population Division. Trends in maternal mortality: 1990 to 2015. <http://www.who.int/reproductivehealth/publications/monitoring/maternal-mortality-2015/en/>

<sup>[4]</sup> Say L, Chou D, Gemmill A, et al. Global causes of maternal death: A WHO systematic analysis. *Lancet Global Health* 2014; 2(6): e323-33. <http://www.ncbi.nlm.nih.gov/pubmed/25103301>.

<sup>[5]</sup> Lawn JE, Blencowe H, Waiswa P, et al. Stillbirths: rates, risk factors, and acceleration towards 2030. *Lancet* 2016; 387: 587-603. <http://www.ncbi.nlm.nih.gov/pubmed/26794078>. (Supplementary appendix.)
