# Supplementary material for: Estimating the global impact of poor quality of care on maternal and neonatal outcomes in 81 low- and middle-income countries: A modeling study
Source: PubMed Central journal article supplement (PMC6919595; doi:10.1371/journal.pmed.1002990), 2019-12-18
Supplement: pmed.1002990.s003.pdf [file pmed.1002990.s003.pdf]

S2 TABLE: Listing of countries included in the analysis

| Countdown to 2030 Country | iso3 | Group 1 | Group 2 | Most recent household survey | Linked Dataset |
|---------------------------|------|---------|---------|------------------------------|----------------|
| Afghanistan               | AFG  | YES     |         | DHS 2015                     |                |
| Algeria                   | DZA  | YES     |         | MICS 2012                    |                |
| Angola                    | AGO  | YES     |         | DHS 2015                     |                |
| Azerbaijan                | AZE  |         | YES     | DHS 2006                     |                |
| Bangladesh                | BGD  | YES     |         | DHS 2014                     | X              |
| Benin                     | BEN  | YES     |         | MICS 2014                    | X              |
| Bhutan                    | BTN  |         | YES     | MICS 2010                    |                |
| Bolivia                   | BOL  | YES     |         | DHS 2008                     |                |
| Botswana                  | BWA  |         | YES     | Family Health Survey 2007    |                |
| Burkina Faso              | BFA  | YES     |         | DHS 2010                     | X              |
| Burundi                   | BDI  | YES     |         | DHS 2016                     |                |
| Cambodia                  | KHM  | YES     |         | DHS 2014                     |                |
| Cameroon                  | CMR  | YES     |         | MICS 2014                    |                |
| Central African Republic  | CAF  | YES     |         | MICS 2010                    |                |
| Chad                      | TCD  | YES     |         | DHS 2014                     |                |
| Comoros                   | COM  |         | YES     | DHS 2012                     |                |
| Congo, Rep.               | COG  | YES     |         | MICS 2014                    |                |
| Congo, Dem. Rep.          | COD  | YES     |         | DHS 2013                     | X              |
| Côte d'Ivoire             | CIV  | YES     |         | DHS 2011                     |                |
| Djibouti                  | DJI  |         | YES     | MICS 2006                    |                |
| Dominican Republic        | DOM  |         | YES     | MICS 2014                    |                |
| Equatorial Guinea         | GNQ  |         | YES     | DHS 2011                     |                |
| Eritrea                   | ERI  | YES     |         | DHS 2002                     |                |
| Ethiopia                  | ETH  | YES     |         | DHS 2016                     |                |
| Gabon                     | GAB  |         | YES     | DHS 2012                     |                |
| Gambia, The               | GMB  | YES     |         | DHS 2013                     |                |
| Ghana                     | GHA  | YES     |         | DHS 2014                     |                |
| Guatemala                 | GTM  |         | YES     | DHS 2014                     |                |
| Guinea                    | GIN  | YES     |         | DHS 2012                     |                |
| Guinea-Bissau             | GNB  |         | YES     | MICS 2014                    |                |
| Guyana                    | GUY  |         | YES     | MICS 2014                    |                |
| Haiti                     | HTI  | YES     |         | DHS 2012                     | X              |
| Honduras                  | HND  |         | YES     | DHS 2011                     |                |
| India                     | IND  | YES     |         | NFHS 2015                    |                |
| Indonesia                 | IDN  | YES     |         | DHS 2012                     |                |
| Iraq                      | IRQ  | YES     |         | MICS 2011                    |                |
| Jamaica                   | JAM  |         | YES     | MICS 2011                    |                |

|                  |     |     |     |           |   |
|------------------|-----|-----|-----|-----------|---|
| Kenya            | KEN | YES |     | DHS 2014  | X |
| Korea, Dem. Rep. | PRK |     | YES | MICS 2009 |   |
| Kyrgyz Republic  | KGZ |     | YES | MICS 2014 |   |
| Lao PDR          | LAO |     | YES | MICS 2011 |   |
| Lesotho          | LSO |     | YES | DHS 2014  |   |
| Liberia          | LBR | YES |     | DHS 2013  |   |
| Madagascar       | MDG | YES |     | DHS 2008  |   |
| Malawi           | MWI | YES |     | DHS 2015  | X |
| Mali             | MLI | YES |     | MICS 2015 |   |
| Mauritania       | MRT | YES |     | MICS 2015 | X |
| Morocco          | MAR | YES |     | DHS 2003  |   |
| Mozambique       | MOZ | YES |     | DHS 2011  |   |
| Myanmar          | MMR | YES |     | DHS 2015  |   |
| Namibia          | NAM |     | YES | DHS 2013  | X |
| Nepal            | NPL | YES |     | DHS 2016  | X |
| Nicaragua        | NIC |     | YES | RHS 2006  |   |
| Niger            | NER | YES |     | DHS 2012  |   |
| Nigeria          | NGA | YES |     | MICS 2016 |   |
| Pakistan         | PAK | YES |     | DHS 2012  |   |
| Panama           | PAN |     | YES | MICS 2013 |   |
| Papua New Guinea | PNG | YES |     | DHS 2006  |   |
| Paraguay         | PRY |     | YES | RHS 2008  |   |
| Philippines      | PHL | YES |     | DHS 2013  |   |
| Rwanda           | RWA | YES |     | DHS 2014  | X |
| Senegal          | SEN | YES |     | DHS 2016  | X |
| Sierra Leone     | SLE | YES |     | DHS 2013  | X |
| Solomon Islands  | SLB |     | YES | DHS 2006  |   |
| Somalia          | SOM | YES |     | MICS 2006 |   |
| South Africa     | ZAF | YES |     | DHS 2003  |   |
| South Sudan      | SSD | YES |     | MICS 2010 |   |
| Sudan            | SDN | YES |     | MICS 2014 |   |
| Suriname         | SUR |     | YES | MICS 2010 |   |
| Swaziland        | SWZ |     | YES | MICS 2014 |   |
| Tajikistan       | TJK |     | YES | DHS 2012  |   |
| Tanzania         | TZA | YES |     | DHS 2015  | X |
| Timor-Leste      | TLS |     | YES | DHS 2016  |   |
| Togo             | TGO | YES |     | DHS 2013  | X |
| Turkmenistan     | TKM |     | YES | MICS 2015 |   |
| Uganda           | UGA | YES |     | DHS 2016  | X |
| Uzbekistan       | UZB |     | YES | MICS 2006 |   |

|               |     |           |           |                                      |           |
|---------------|-----|-----------|-----------|--------------------------------------|-----------|
| Venezuela, RB | VEN | YES       |           | UNICEF SOWC<br>2009-2013<br>estimate |           |
| Yemen, Rep.   | YEM | YES       |           | DHS 2013                             |           |
| Zambia        | ZMB | YES       |           | DHS 2013                             |           |
| Zimbabwe      | ZWE | YES       |           | DHS 2015                             | X         |
| <b>TOTAL</b>  |     | <b>53</b> | <b>28</b> |                                      | <b>17</b> |

Group 1: U5MR and/or MMR above target and included in countries accounting for 95% of all U5 or maternal deaths

Group 2: U5MR and/or MMR above target but **not** included in countries accounting for 95% of all U5 or maternal deaths

(In-depth country profiles and reports are available from [Countdown to 2030](#))
